# Supplementary material
Source: PubMed Central journal article supplement (PMC3421807)
Supplement: JCM.00801-12_zjm999091865so1.pdf [file JCM.00801-12_zjm999091865so1.pdf]

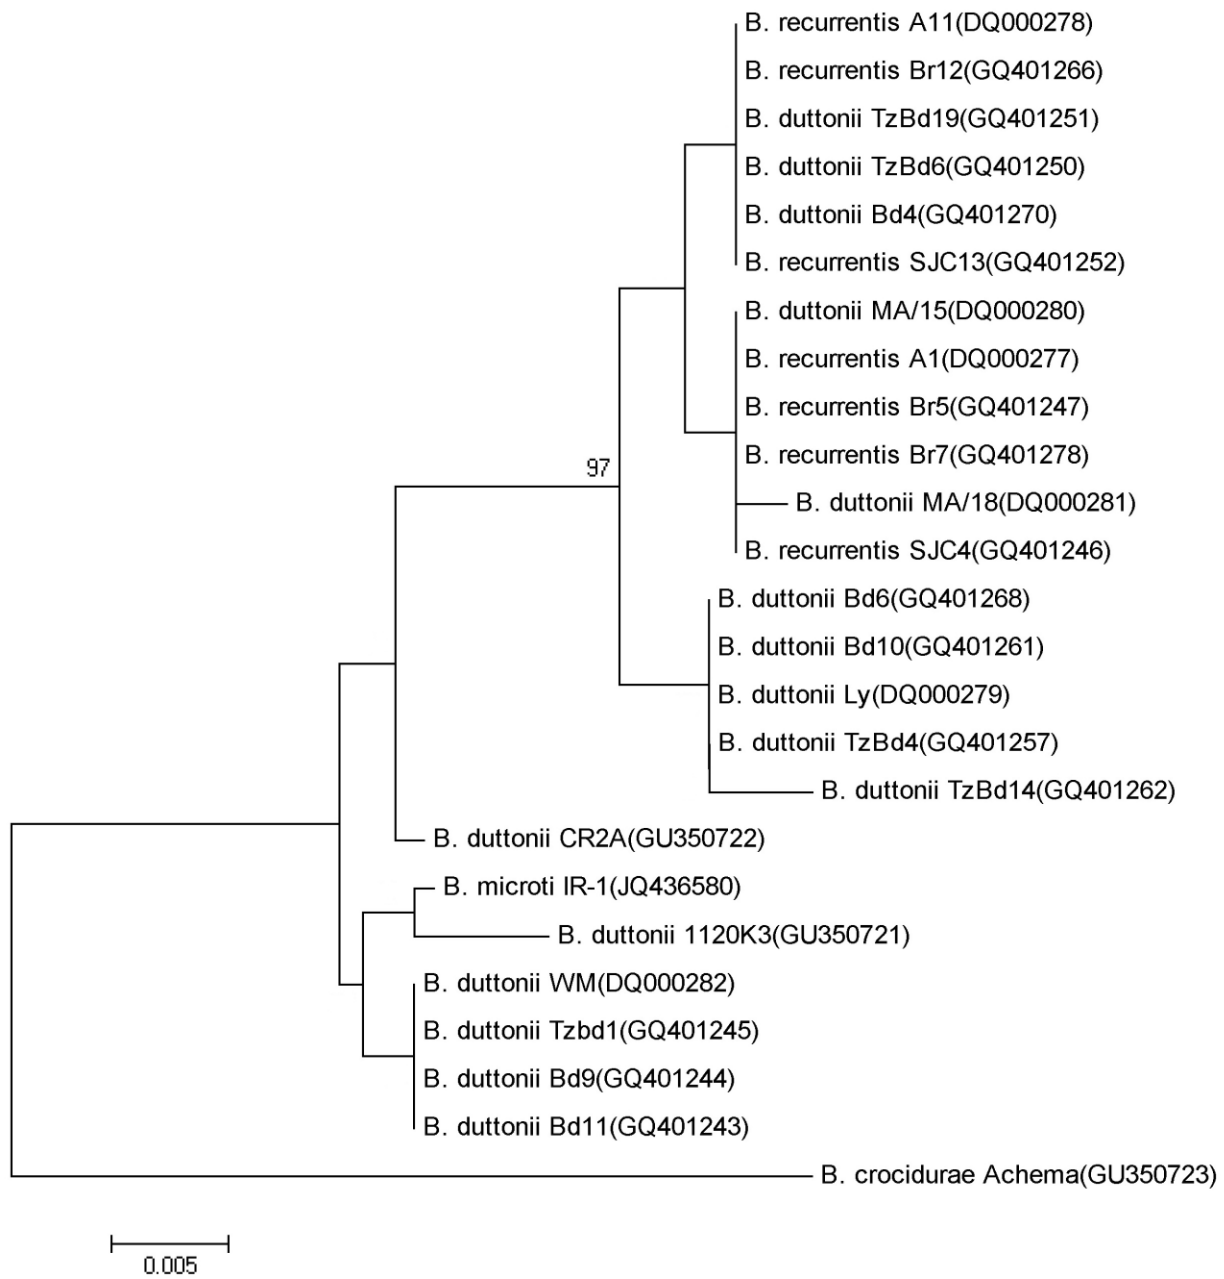

Phylogenetic tree based on IGS region. The scale bar corresponds to a 0.005 distance. The details of sequences used for construction of the tree are given in Table 2.
